# Supplementary material for: MRGPRX2 signaling involves the Lysyl-tRNA synthetase and MITF pathway
Source: PubMed Central journal article supplement (PMC10206166; doi:10.3389/fimmu.2023.1154108), 2023-05-10
Supplement: Image_1.pdf [file Image_1.pdf]

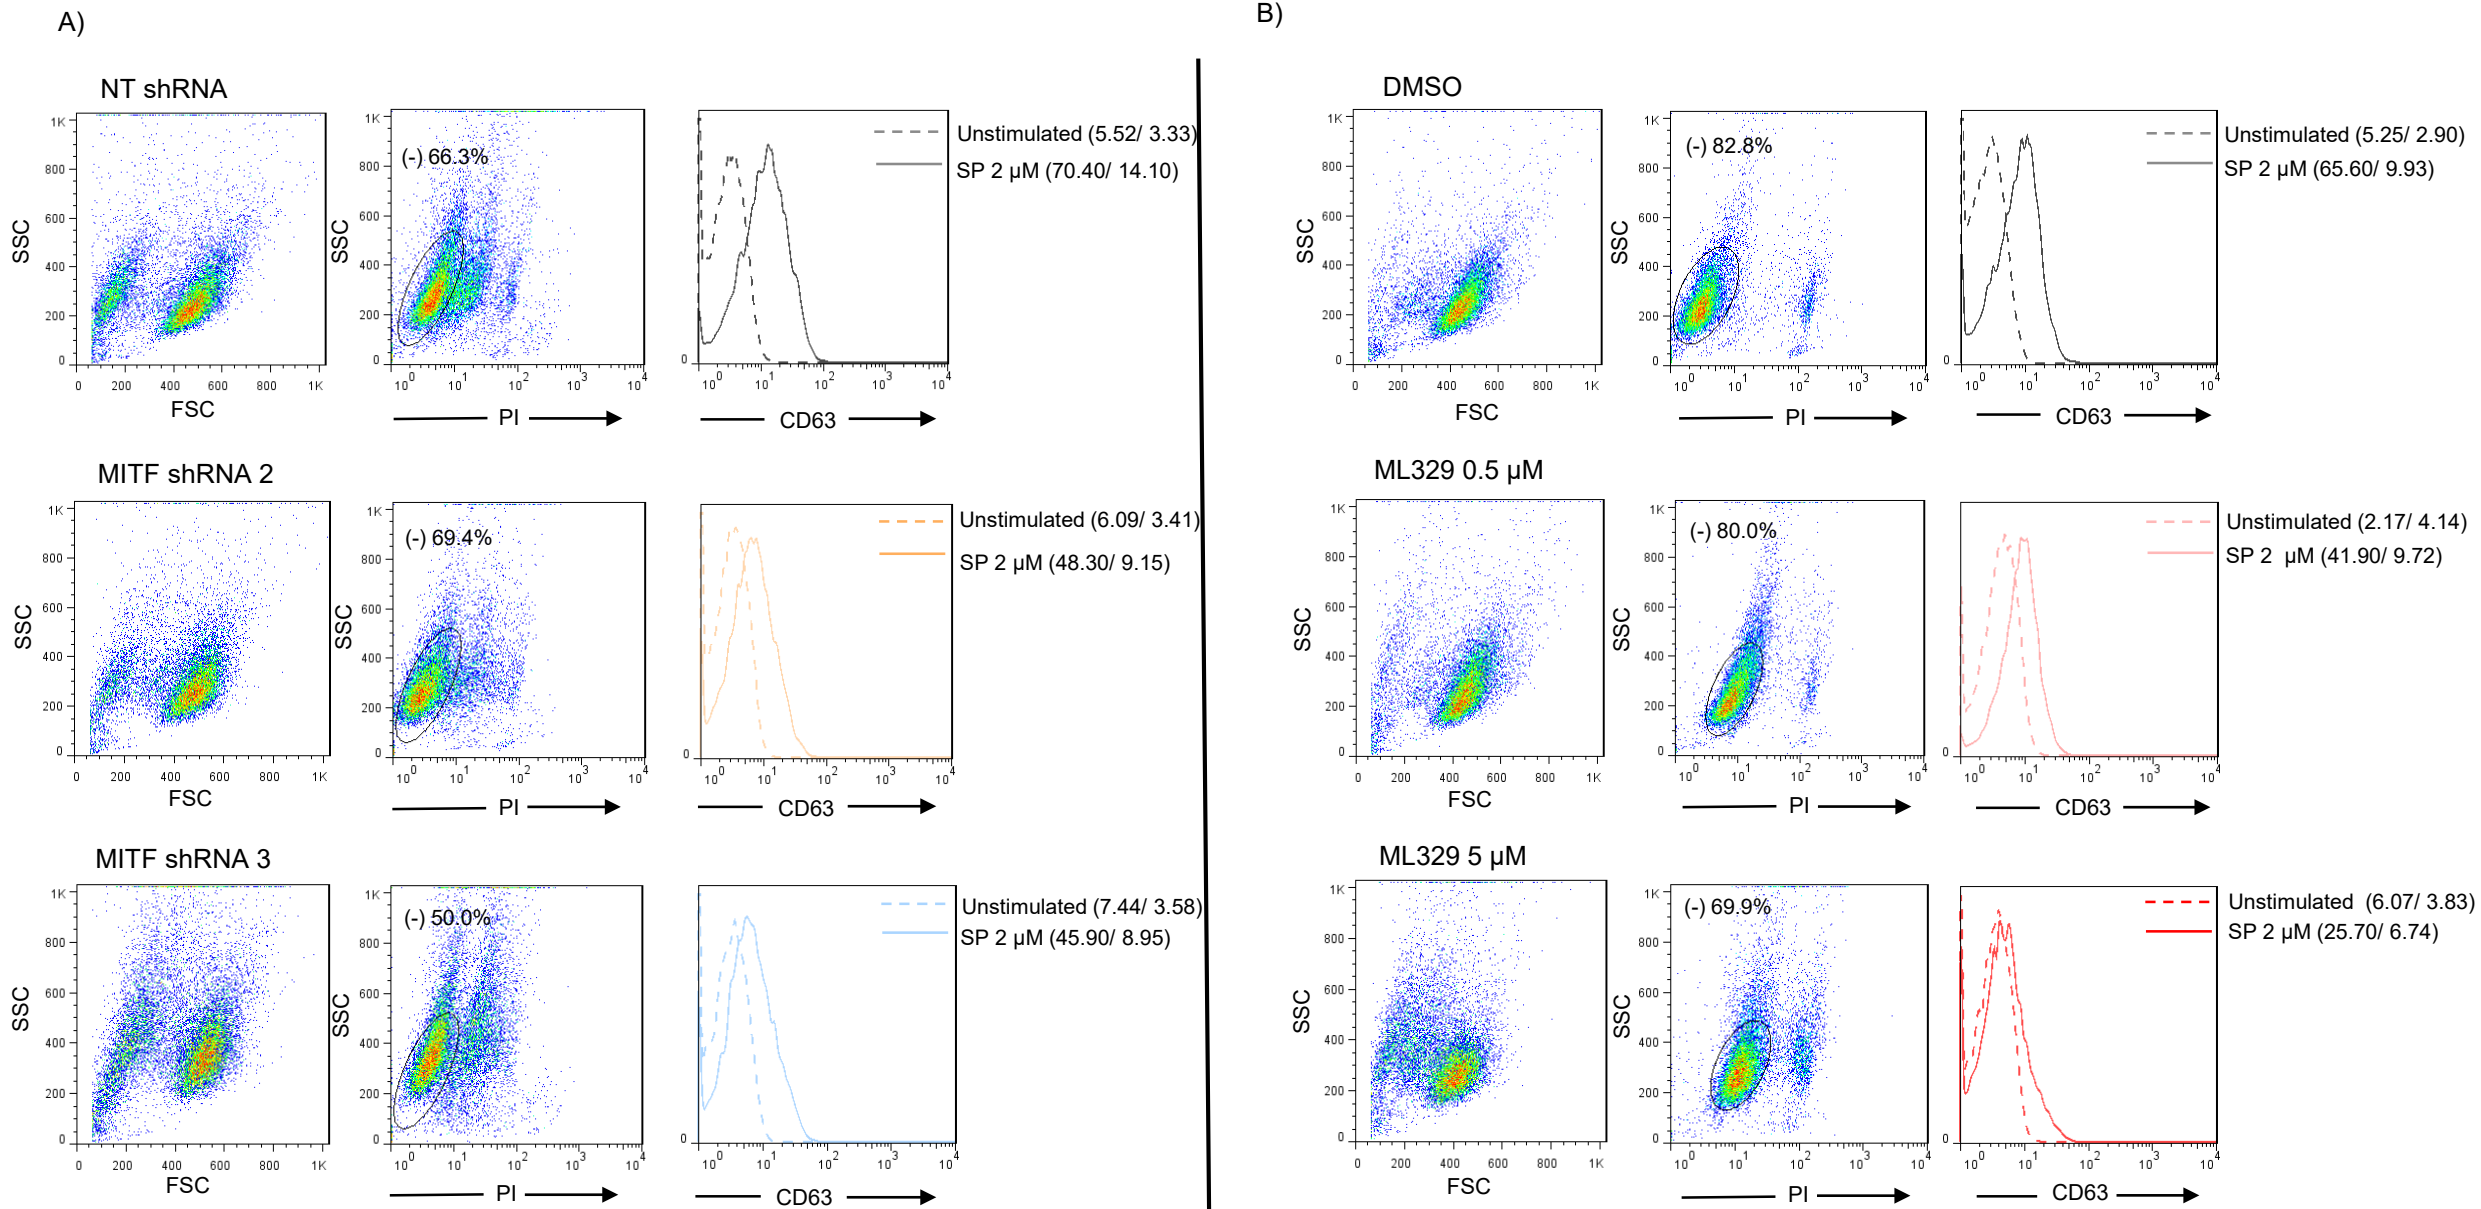

**Supplementary Figure 1. CD63 expression after MITF silencing or ML329 treatment in propidium iodide (PI) negative gated LAD2 cells.** (A) CD63 expression was measured in NT shRNA, MITF shRNA 2, and MITF shRNA 3 transduced cells, after five days of infection, by flow cytometry; and (B) after DMSO or 0.5  $\mu$ M or 5 $\mu$ M ML329 treatment for five days. The (%/ MFI) of CD63 was shown for unstimulated and 2  $\mu$ M SP stimulated cells in the same plot. MFI: Mean of Fluorescence Intensity. Notice that ML329 has some intrinsic fluorescence.
