# Supplementary material for: MRGPRX2 signaling involves the Lysyl-tRNA synthetase and MITF pathway
Source: PubMed Central journal article supplement (PMC10206166; doi:10.3389/fimmu.2023.1154108), 2023-05-10
Supplement: Image_3.pdf [file Image_3.pdf]

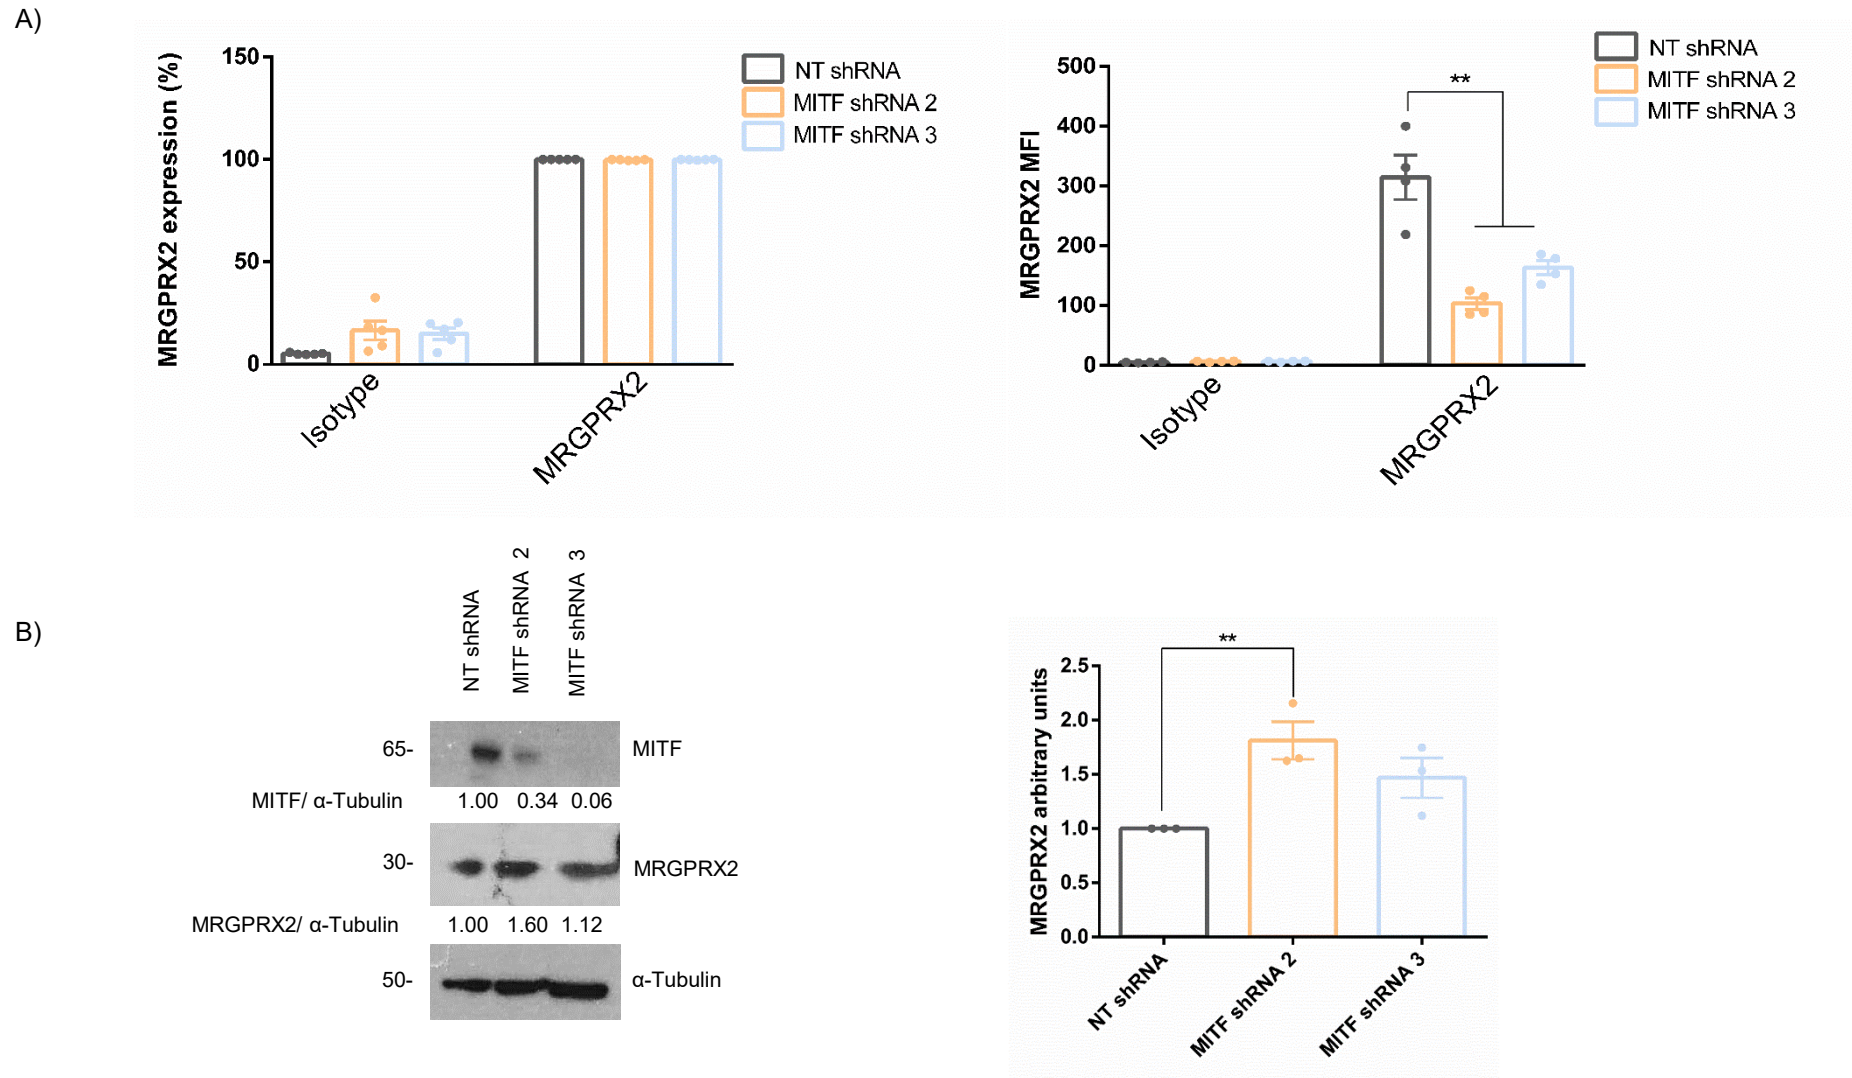

**Supplementary Figure 3. MRGPRX2 expression after MITF silencing.** (A) MRGPRX2 expression (% and Mean of Fluorescence Intensity (MFI) was measured by flow cytometry (n=4). (B) Total MRGPRX2 levels were measured by western blot (n=3). The unpaired t-test was used to determine significant differences, \*\* p< 0.01.
