# Supplementary material for: MRGPRX2 signaling involves the Lysyl-tRNA synthetase and MITF pathway
Source: PubMed Central journal article supplement (PMC10206166; doi:10.3389/fimmu.2023.1154108), 2023-05-10
Supplement: Image_4.pdf [file Image_4.pdf]

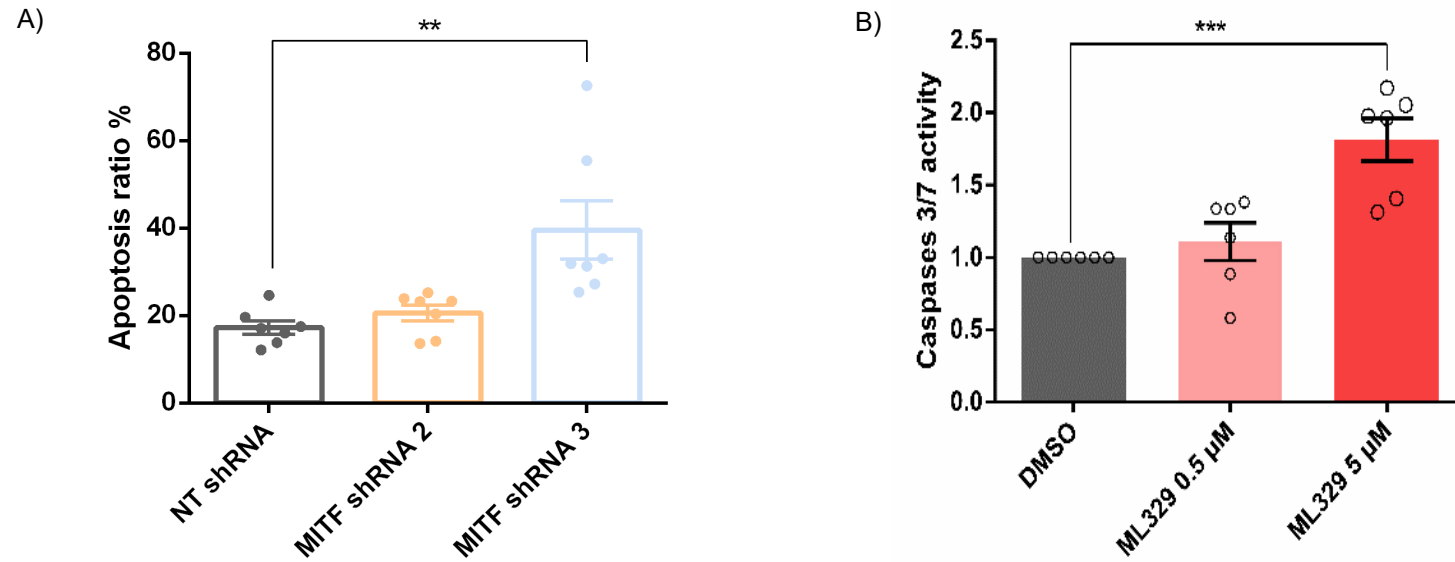

**Supplementary Figure 4. MITF knockdown increases apoptosis in mast cells.** (A) Apoptosis assays (Annexin %) in NT shRNA, MITF shRNA 2 and MITF shRNA 3 transduced LAD2 cells were assessed. (B) Caspase 3/7 activity was measured after incubating LAD 2 cells with DMSO, or ML329 (day 5). The unpaired t-test was used for statistical analysis (\*\*p<0.01, \*\*\*p<0.001). Experiments are the mean ± SEM (n=3).
